# Supplementary material
Source: Springer Nature journal article supplement (https://www.springermedizin.de/resource/supplementary/12967_2012_1506_MOESM3_ESM.pdf/9574214)

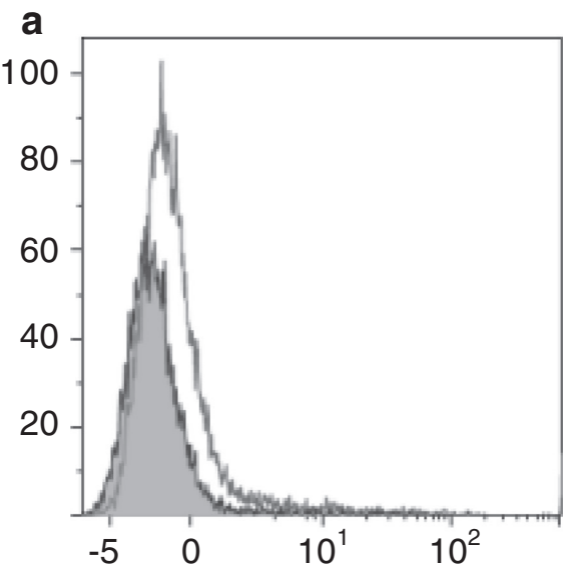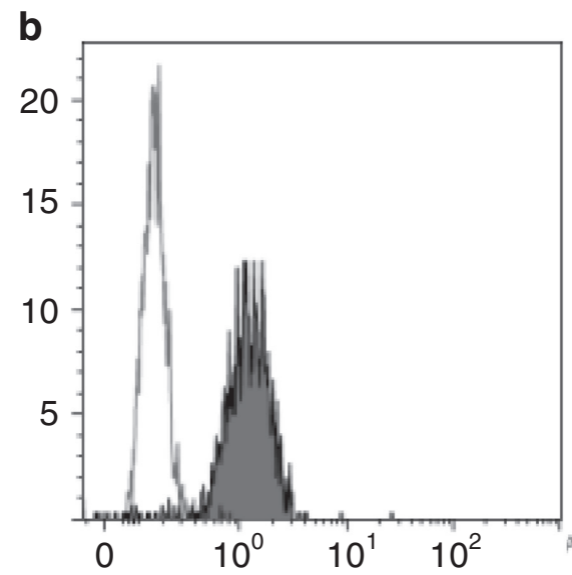

Supplement: MOESM3 [file 9574214]
